# Supplementary material
Source: publisher site journal article supplement (https://www.spandidos-publications.com/4941/downloadSupplementary)
Supplement: Supplementary file 1 [file downloadSupplementary]

## Sheet: sheet1
Table SII. Radiomics techniques and parameters.
Model	Images	Validation or test	Case numbers		AUC	Sensitivity	Specificity	PPV	NPV	Accuracy	First author (Ref.)a	Published year
			CNSL (PCNSL)	non-CNSL (HGG)
Feature-based radiomics	ADC + CE-T1WI	External validation	14 (14)	28 (28)	0.946	0.857	0.821	0.70535	0.919888	0.833	Kang et al (52)	2018
			14 (14)	28 (28)	0.947	0.929	0.821	NA	NA	NA	Yun et al (61)	2019
		Cross-vendor validation test set	46 (46)	45 (45)	0.943	0.891	0.933	NA	NA	0.912	Xia et al (53)	2021
		Mixed-vendor validation test set	26 (26)	22 (22)	0.935	0.923	0.909	NA	NA	0.917
	18F-FDG-PET/CT	Cross-vendor validation	24 (24)	53 (53)	0.971-0.998	NA	NA	NA	NA	NA	Kong et al (41)	2019
Deep learning-based radiomics	CE-T1WI	Test	24 (24)	35 (35)	0.940b	100%b	86%b	NA	NA	93%b	McAvoy et al (57)	2021
					0.950c	87%c	100%c	NA	NA	94%c
	ADC + CE-T1WI	External validation	14 (14)	28 (28)	0.486	1	0.357	NA	NA	NA	Yun et al (61)	2019
	DSC MRI		15 (15)	28 (28)	0.89	0.95	0.765	NA	NA	NA	Park et al (62)	2020
	ADC + CE-T1WI + FLAIR	5-fold cross validation	136 (136)	153 (153)	0.964	0.93	0.867	0.86	0.94	0.899	Xia et al (59)	2021
aReferences are included in the manuscript. bValue of GBM; cValue of PCNSL; ADC, apparent diffusion coefficient; CE-T1WI, contrast-enhanced T1-weighted imaging; 18F-FDG-PET/CT, 18F-fluorodeoxyglucose positron emission tomography/computed tomography; DSC, dynamic susceptibility contrast; MRI, magnetic resonance imaging; PCNSL, primary central nervous system lymphoma; HGG, high-grade glioma; FLAIR,…
